# Supplementary material for: Alpha-ketoglutarate extends Drosophila lifespan by inhibiting mTOR and activating AMPK
Source: publisher site journal article supplement (doi:10.18632/aging.102045), 2019-06-26
Supplement: Supplementary file [file aging-v11i12-102045-supplementary-material-SD1.pdf]

SUPPLEMENTARY FIGURES

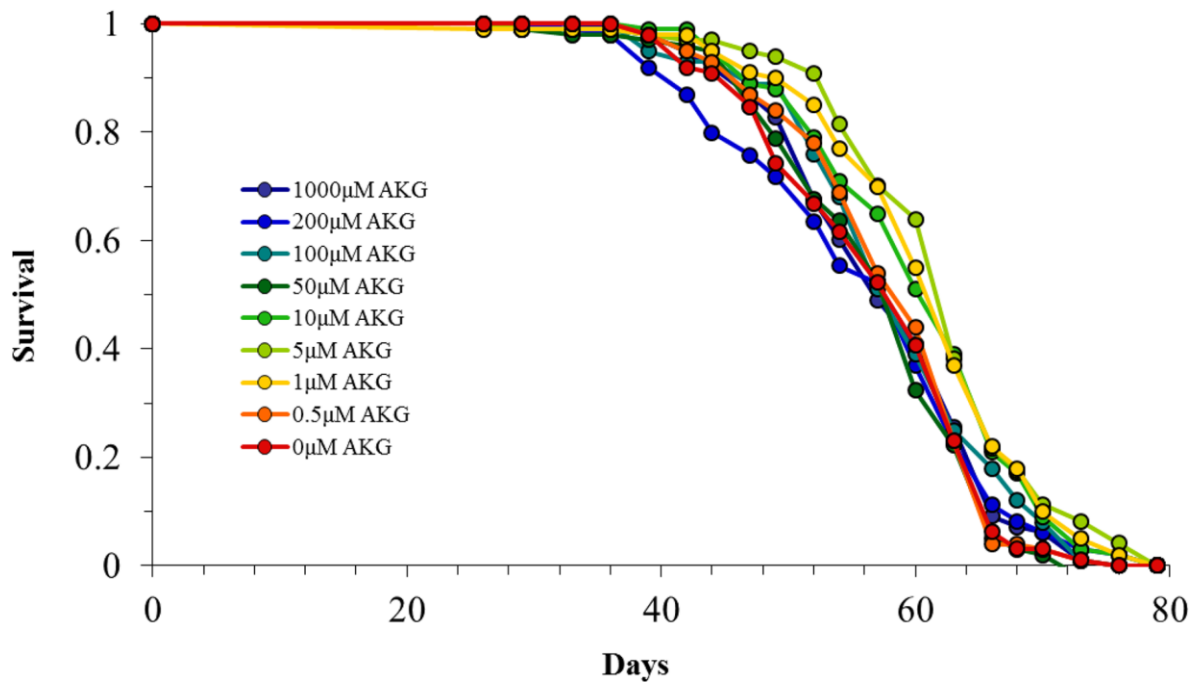

Supplementary Figure 1. Effects of different AKG concentrations (0, 0.5, 1, 5, 10, 50, 100, 200, and 1000 μM) on *Drosophila* lifespan.

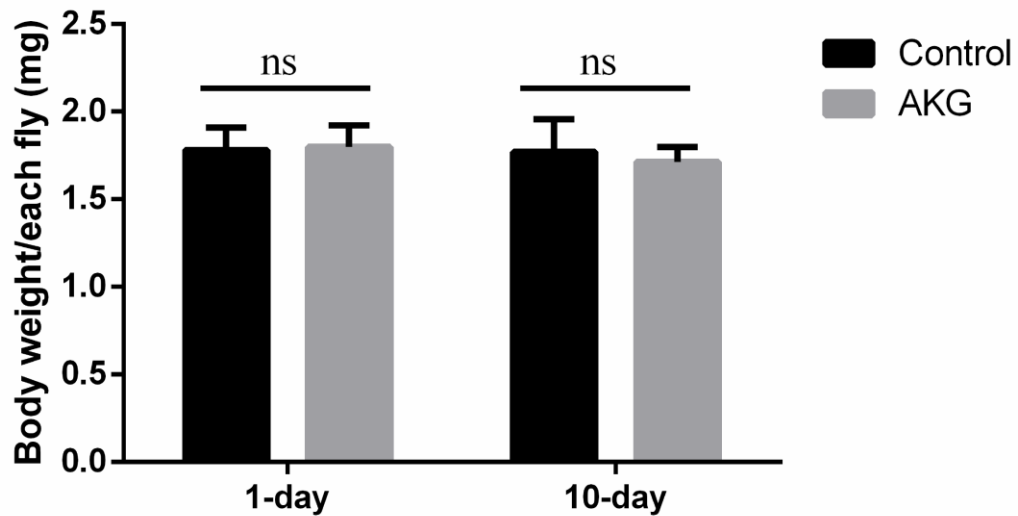

Supplementary Figure 2. AKG had no effect on the body weight of flies (10 days old) (ns = nonsignificant,  $p > 0.05$ , two-tailed Student's *t*-tests).

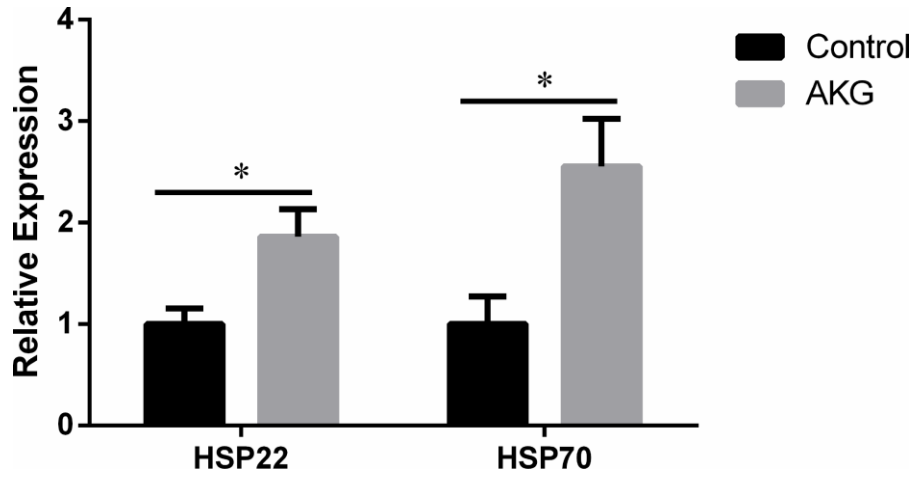

Supplementary Figure 3. Relative mRNA expression of *HSP22* and *HSP70* (\* $p < 0.05$ , two-tailed Student's *t*-tests).

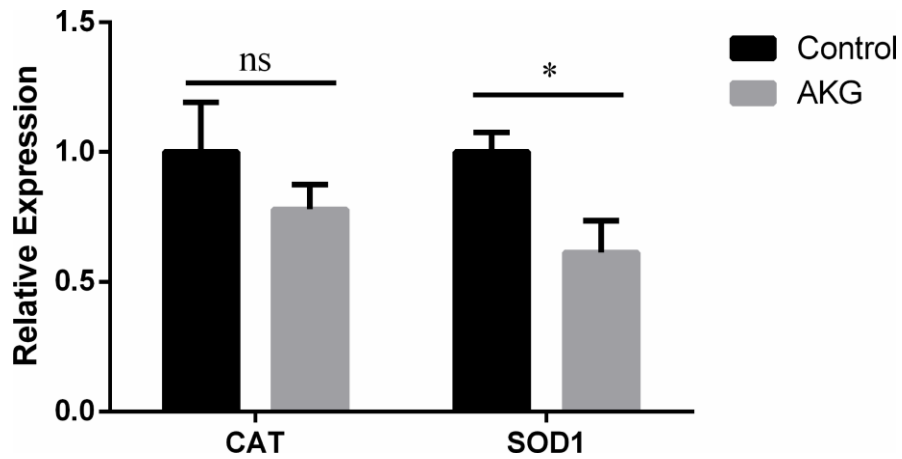

Supplementary Figure 4. Relative mRNA expression of *CAT* and *SOD1* (ns = nonsignificant,  $p > 0.05$ ; \* $p < 0.05$ ; two-tailed Student's *t*-tests).

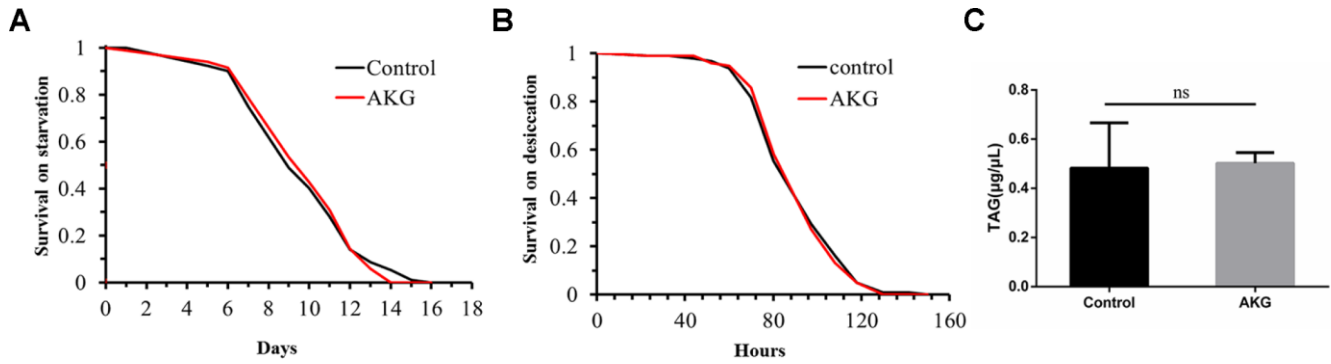

**Supplementary Figure 5. Anti-oxidative stress effects of AKG on *Drosophila*.** (A) There were no differences in sensitivity to starvation stress between control and AKG-treated flies (5 µM AKG vs control,  $p > 0.05$ , log-rank test). (B) There were no differences in sensitivity to desiccation stress between control and AKG-treated flies (5 µM AKG vs control,  $p > 0.05$ , log-rank test). (C) There were no differences in triacylglyceride (TAG) levels between control and AKG-treated flies (ns = nonsignificant,  $p > 0.05$ , two-tailed Student's t-tests).
